# Supplementary material for: A comparison of carbon monoxide retrievals between the MOPITT satellite and Canadian High-Arctic ground-based NDACC and TCCON FTIR measurements
Source: Copernicus journal article supplement (doi:10.5194/amt-2022-68), 2022-05-16
Supplement: Supplementary file 1 [file amt-2022-68-supplement.pdf]

*Supplement of*

**A comparison of carbon monoxide retrievals between the MOPITT satellite and Canadian High-Arctic ground-based NDACC and TCCON FTIR measurements**

Ali Jalali et al.

*Correspondence to:* Kaley A. Walker (kaley.walker@utoronto.ca)

## S1 Bias and trend results between NDACC and MOPITT measurements

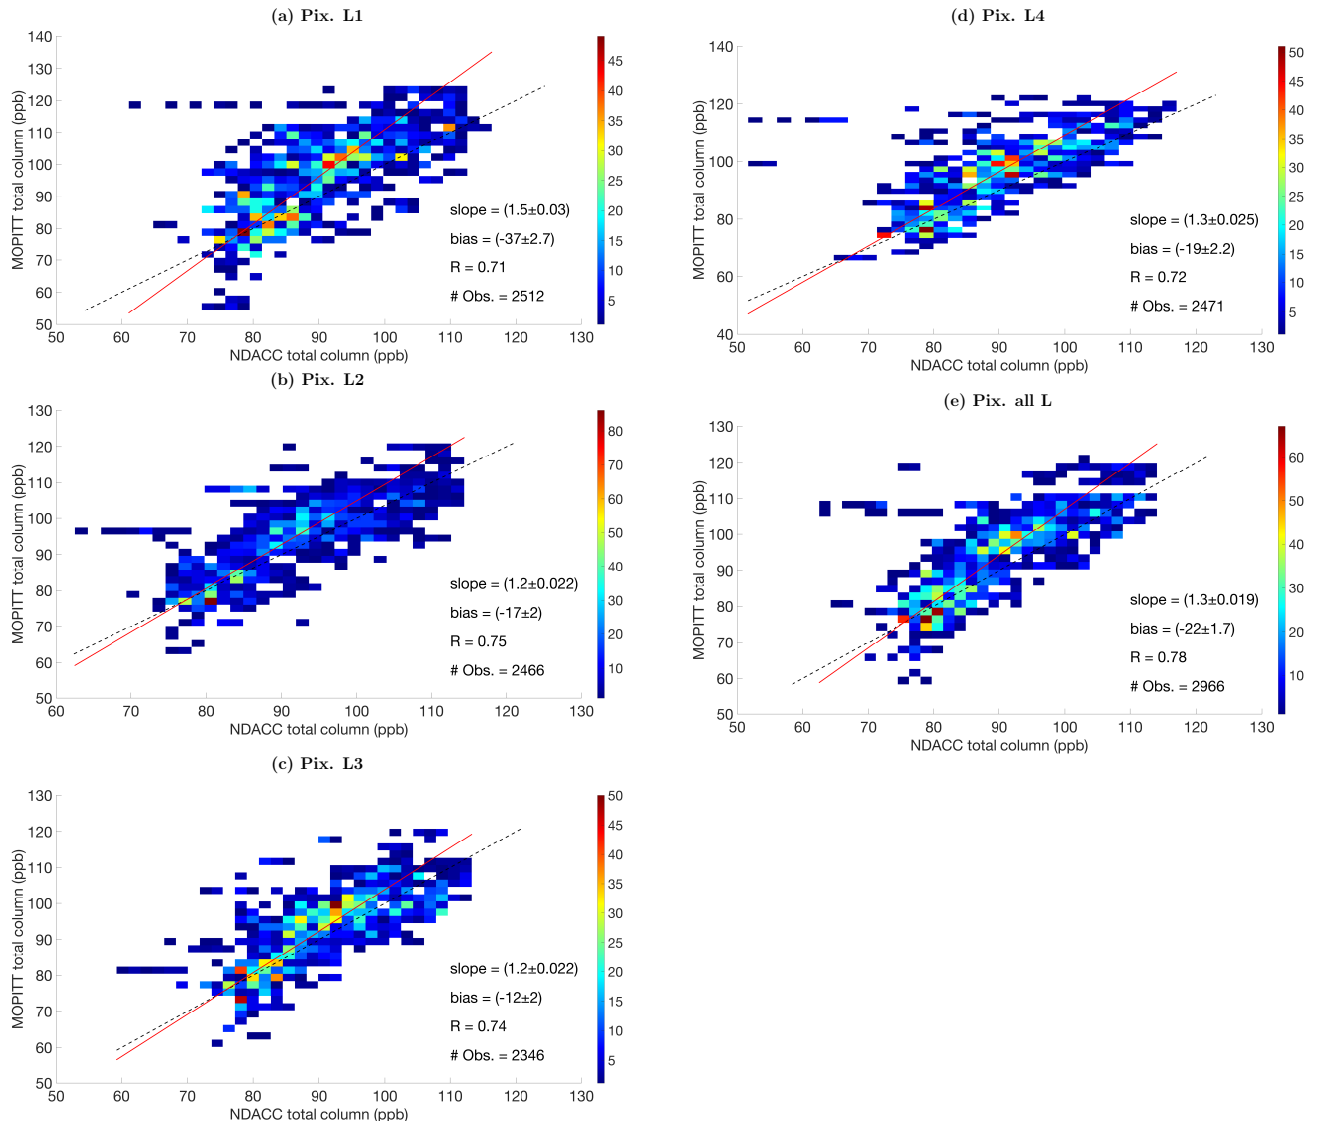

**Figure S1.** Correlation plots for the NDACC measurements vs. MOPITT NIR products for pixels over land measurements.

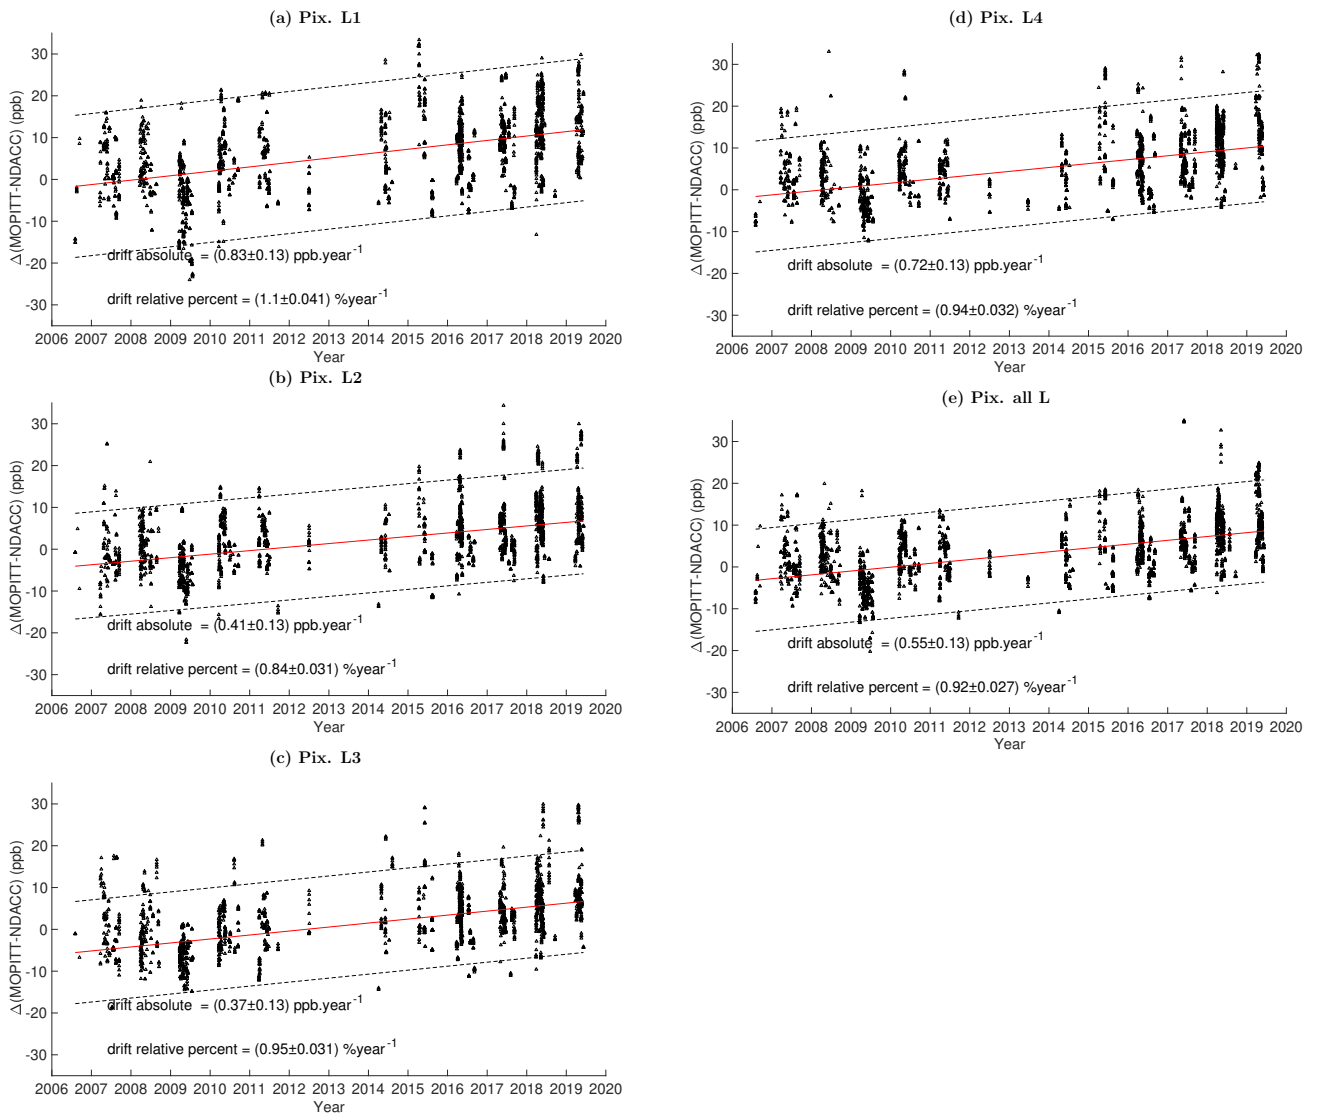

**Figure S2.** Temporal evolution of NDACC and TCCON bias corresponding Fig. S1.

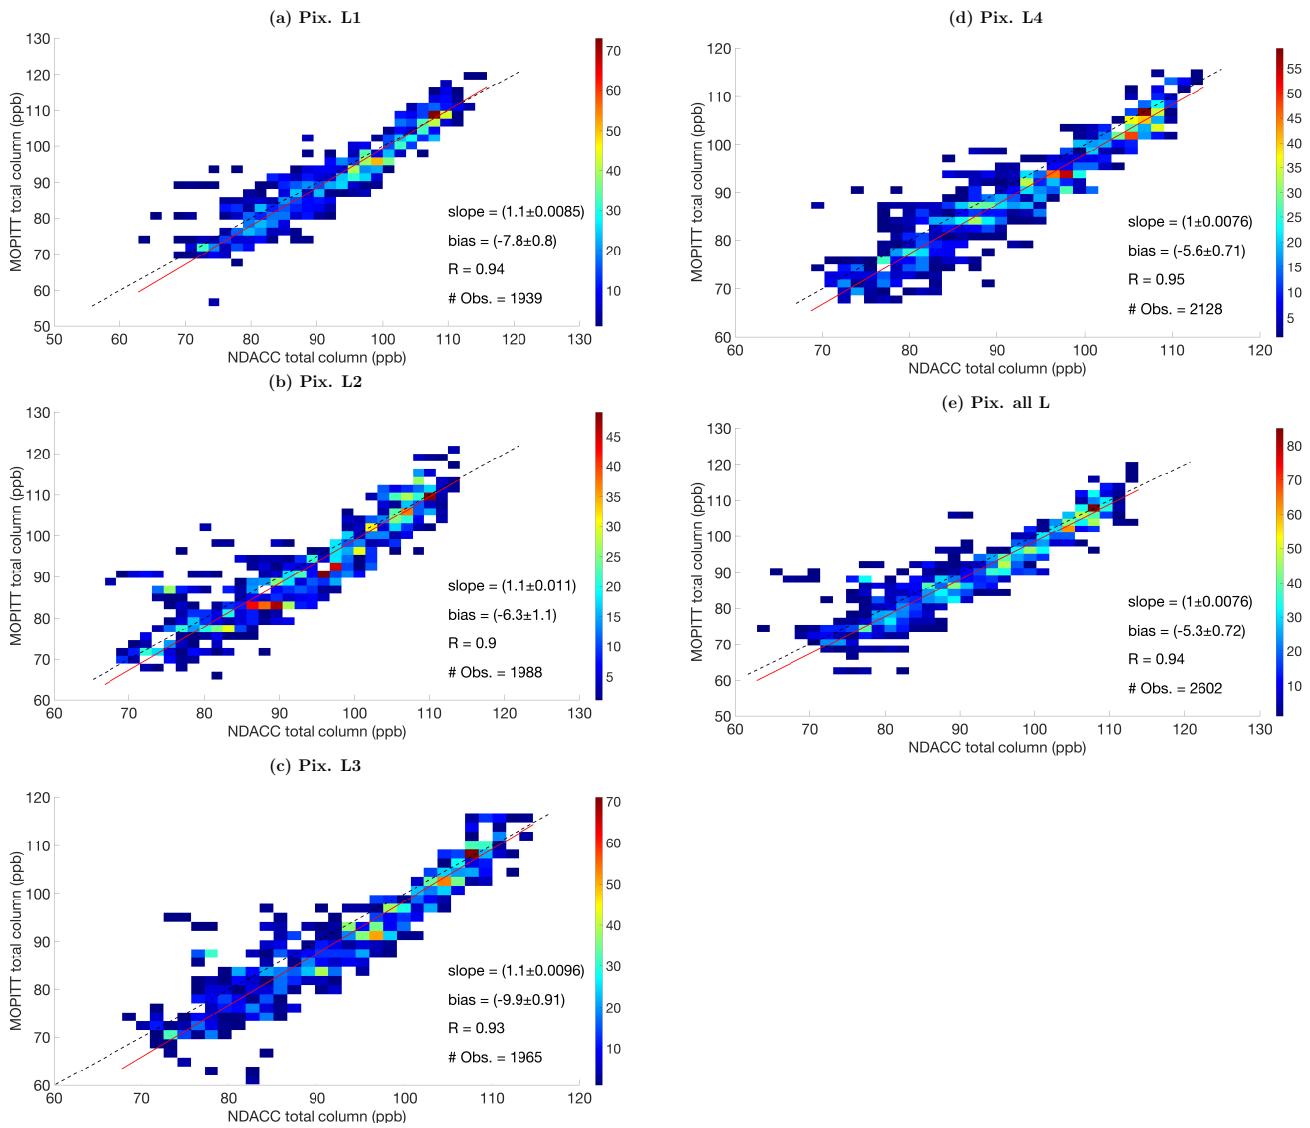

**Figure S3.** Correlation plots for the NDACC measurements vs. MOPITT TIR products for pixels over land measurements.



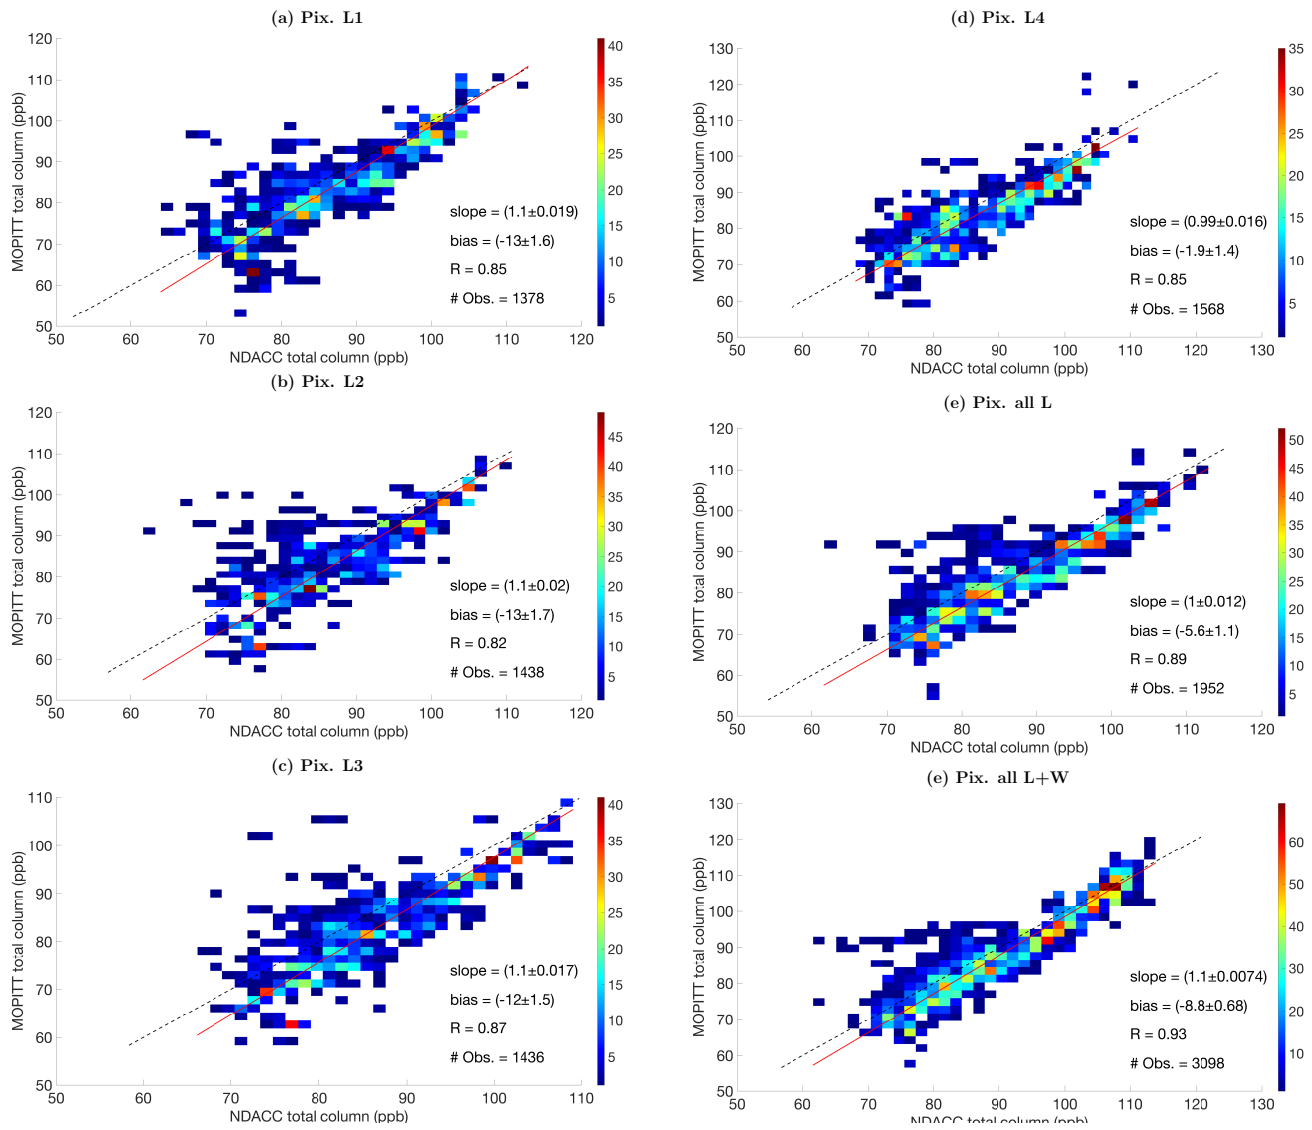

**Figure S4.** Correlation plots for the NDACC measurements vs. MOPITT TIR products for pixels over water measurements.

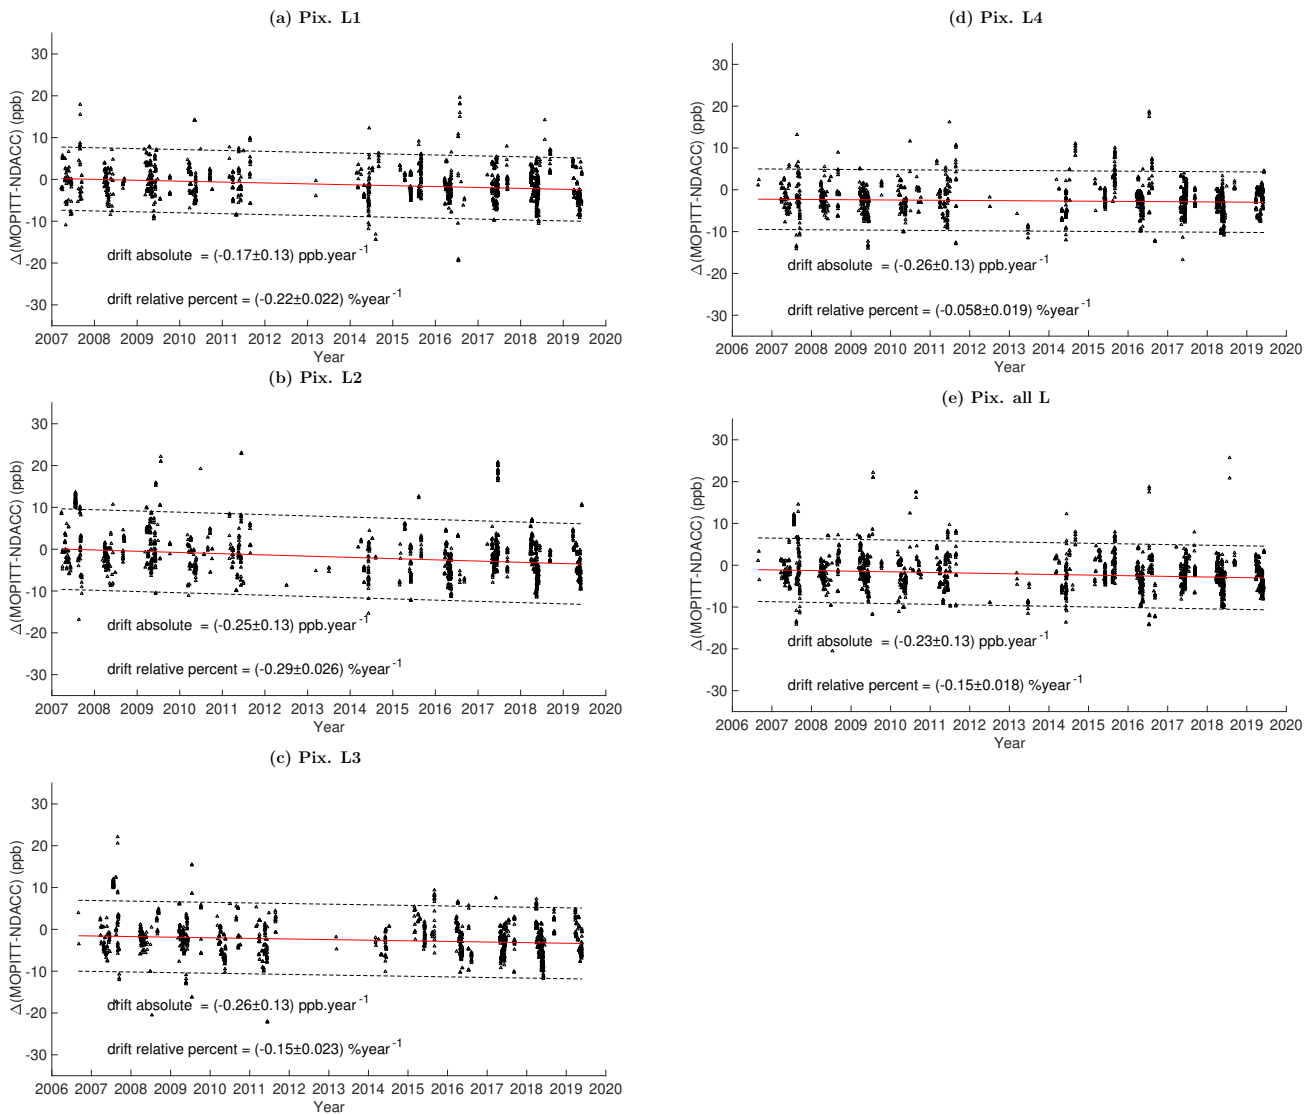

Figure S5. Temporal evolution of NDACC bias corresponding Fig. S3.

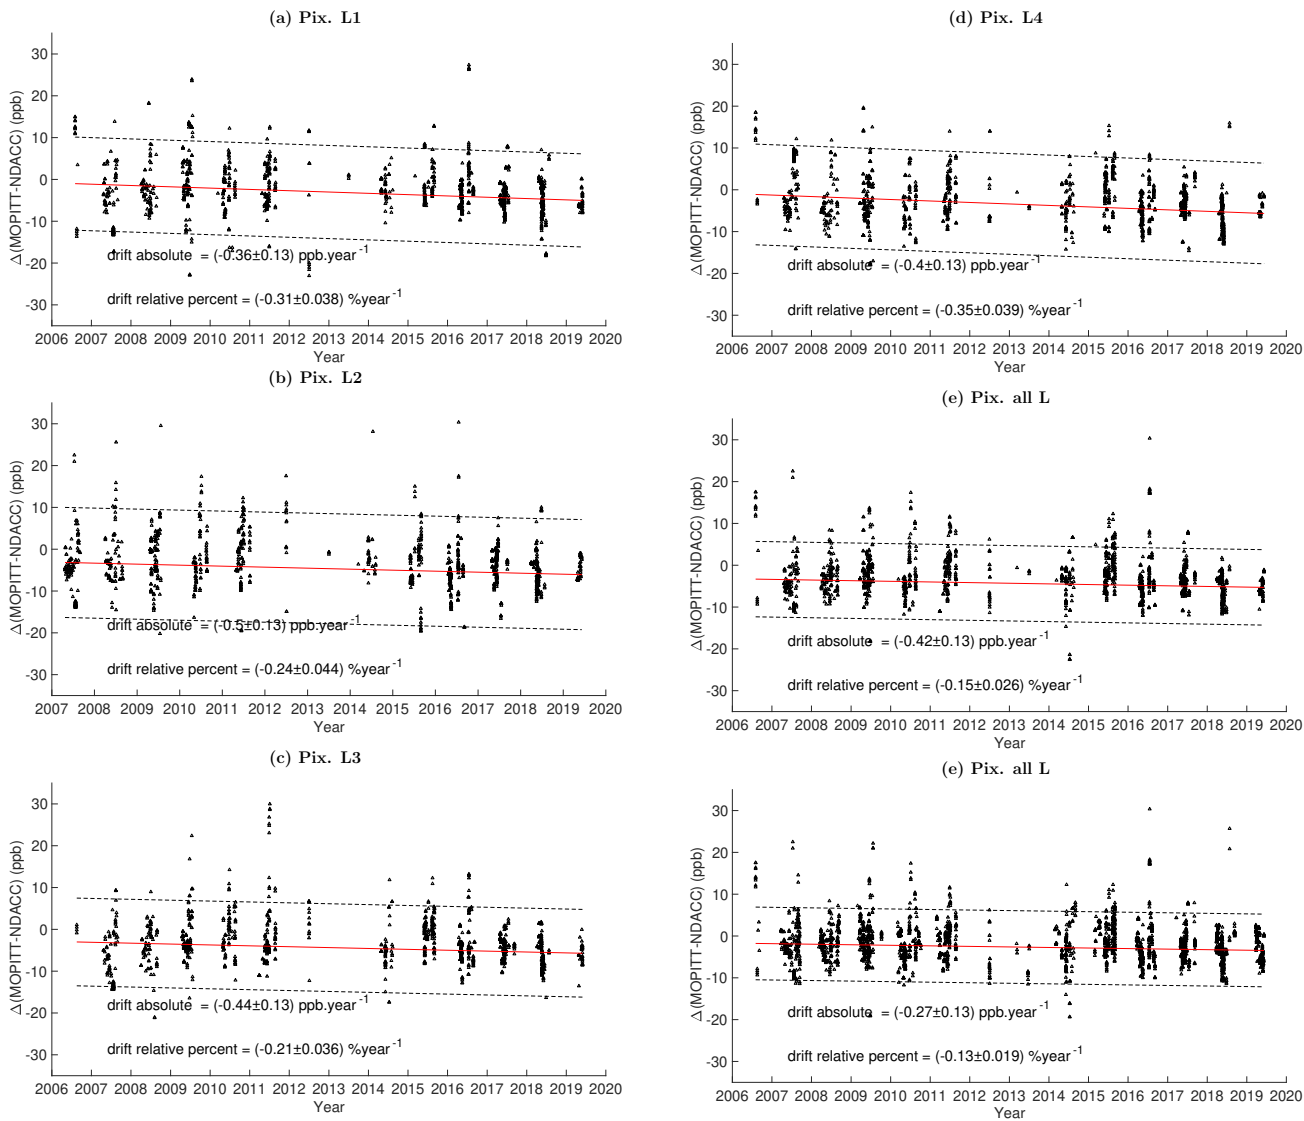

Figure S6. Temporal evolution of NDACC bias corresponding Fig. S4.

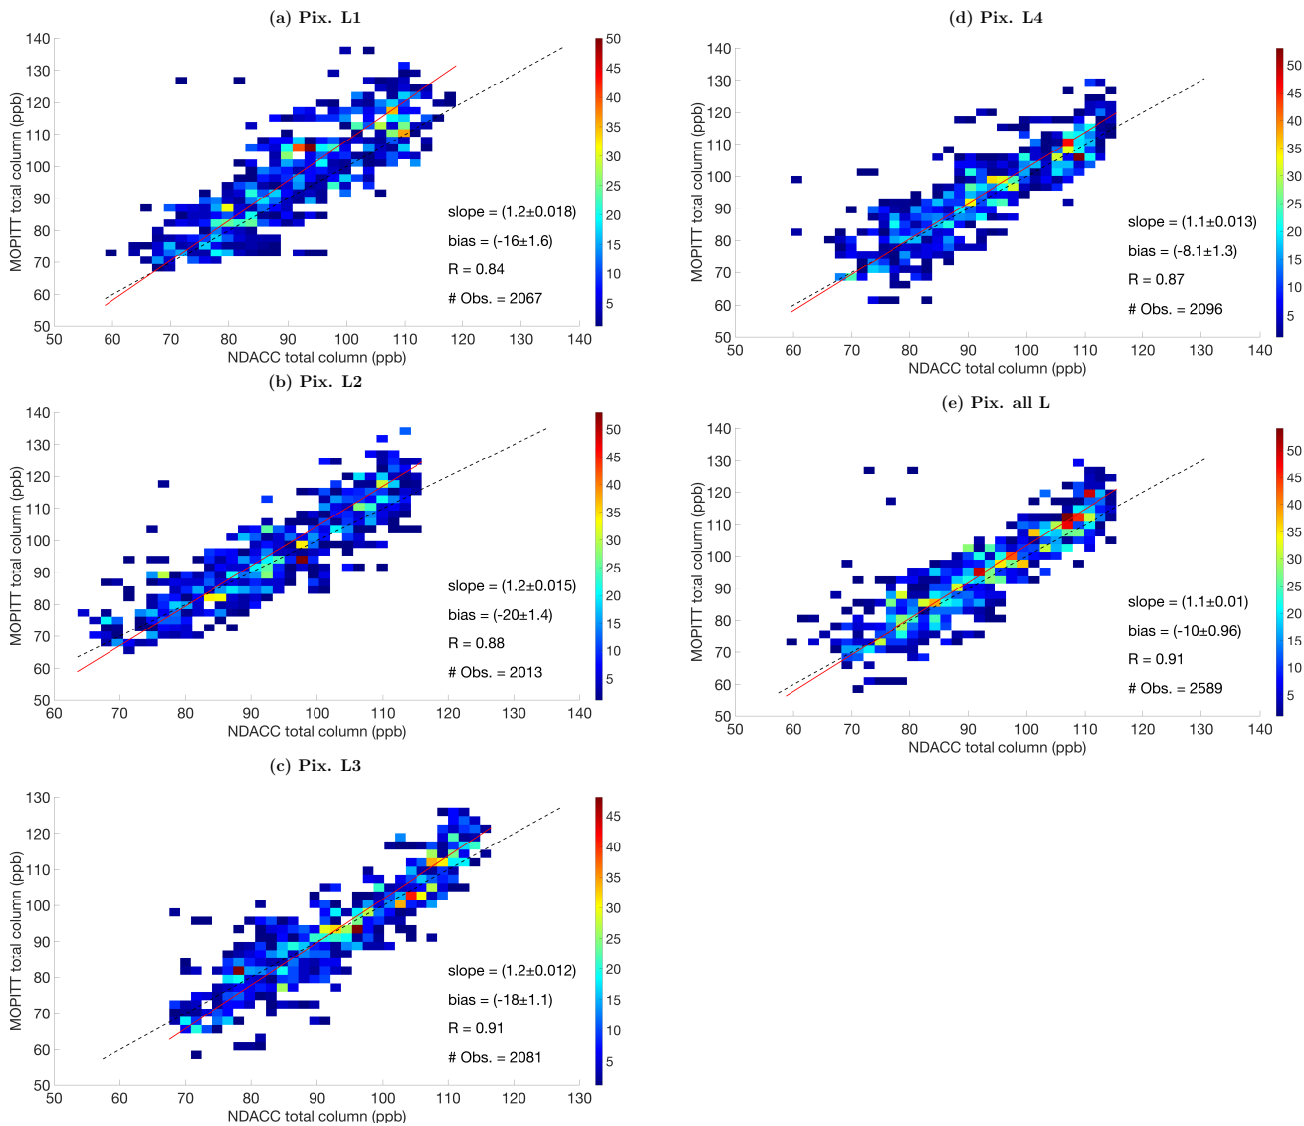

**Figure S7.** Correlation plots for the NDACC measurements vs. MOPITT joint products for pixels over land measurements.

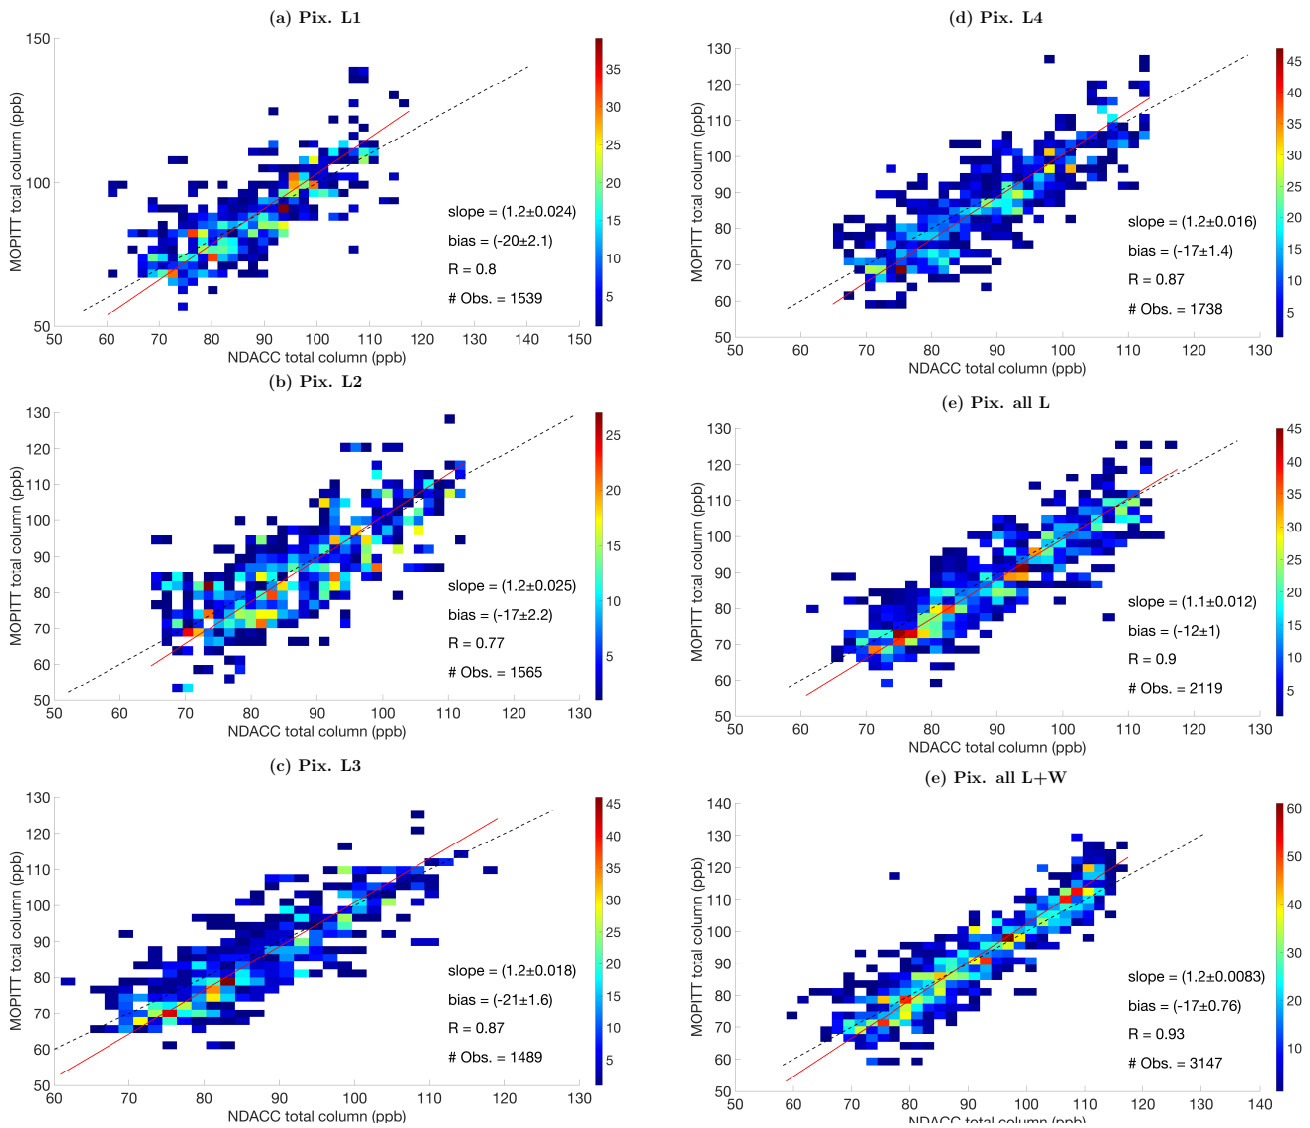

**Figure S8.** Correlation plots for the NDACC measurements vs. MOPITT joint products for pixels over water measurements.

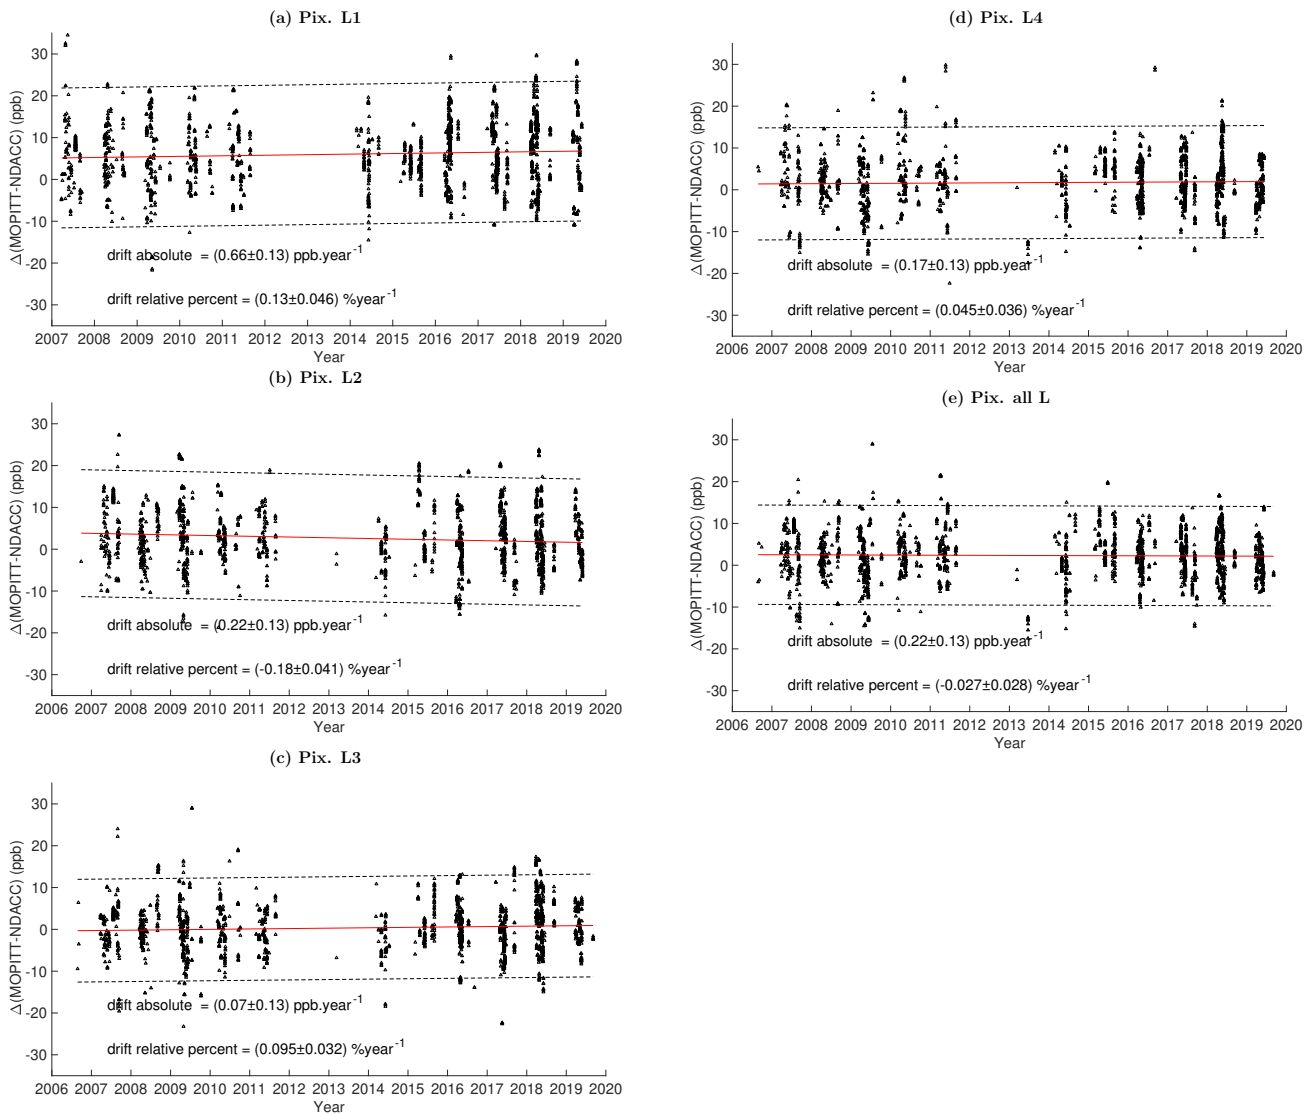

**Figure S9.** Temporal evolution of NDACC bias corresponding Fig. S7.

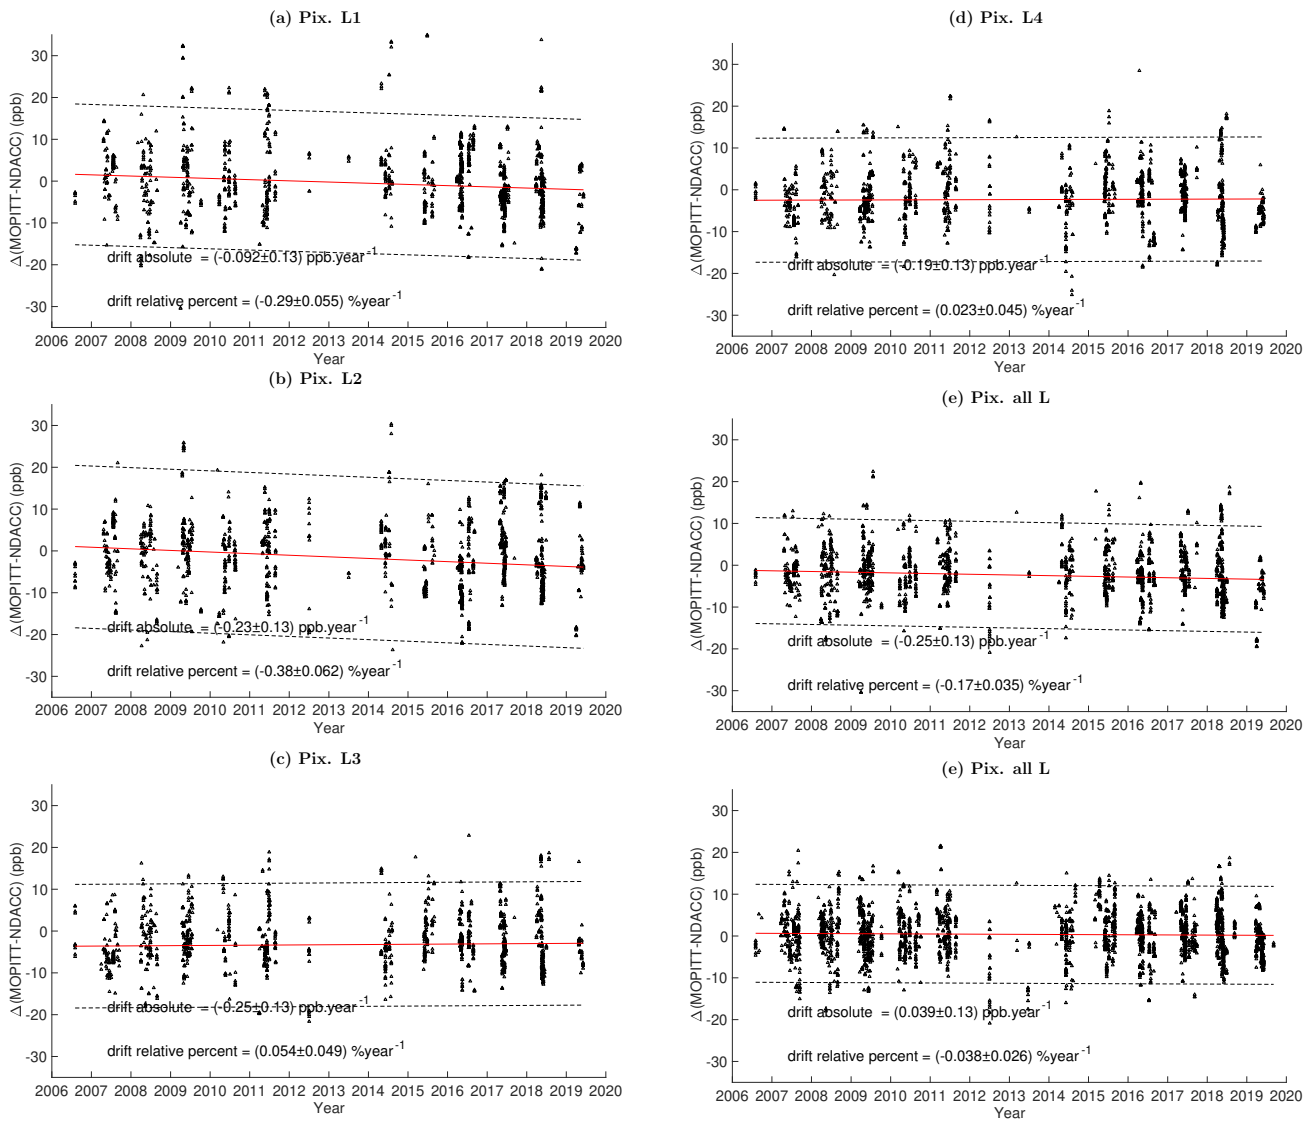

Figure S10. Temporal evolution of NDACC bias corresponding Fig. S8.

## S2 Bias and trend results between TCCON and MOPITT measurements

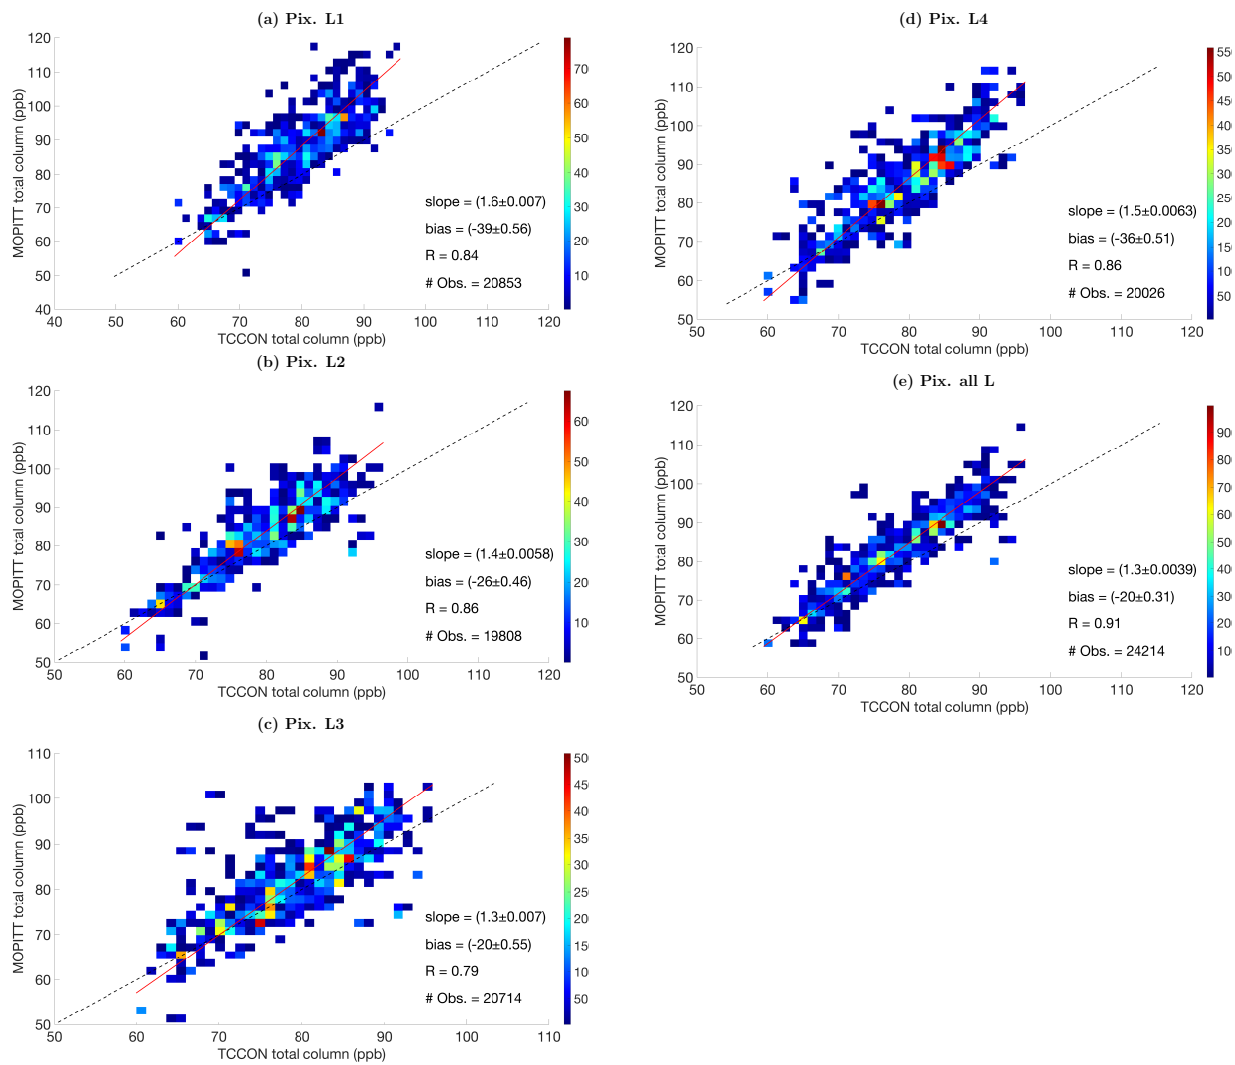

**Figure S11.** Correlation plots for the TCCON measurements vs. MOPITT NIR products for pixels over land measurements.



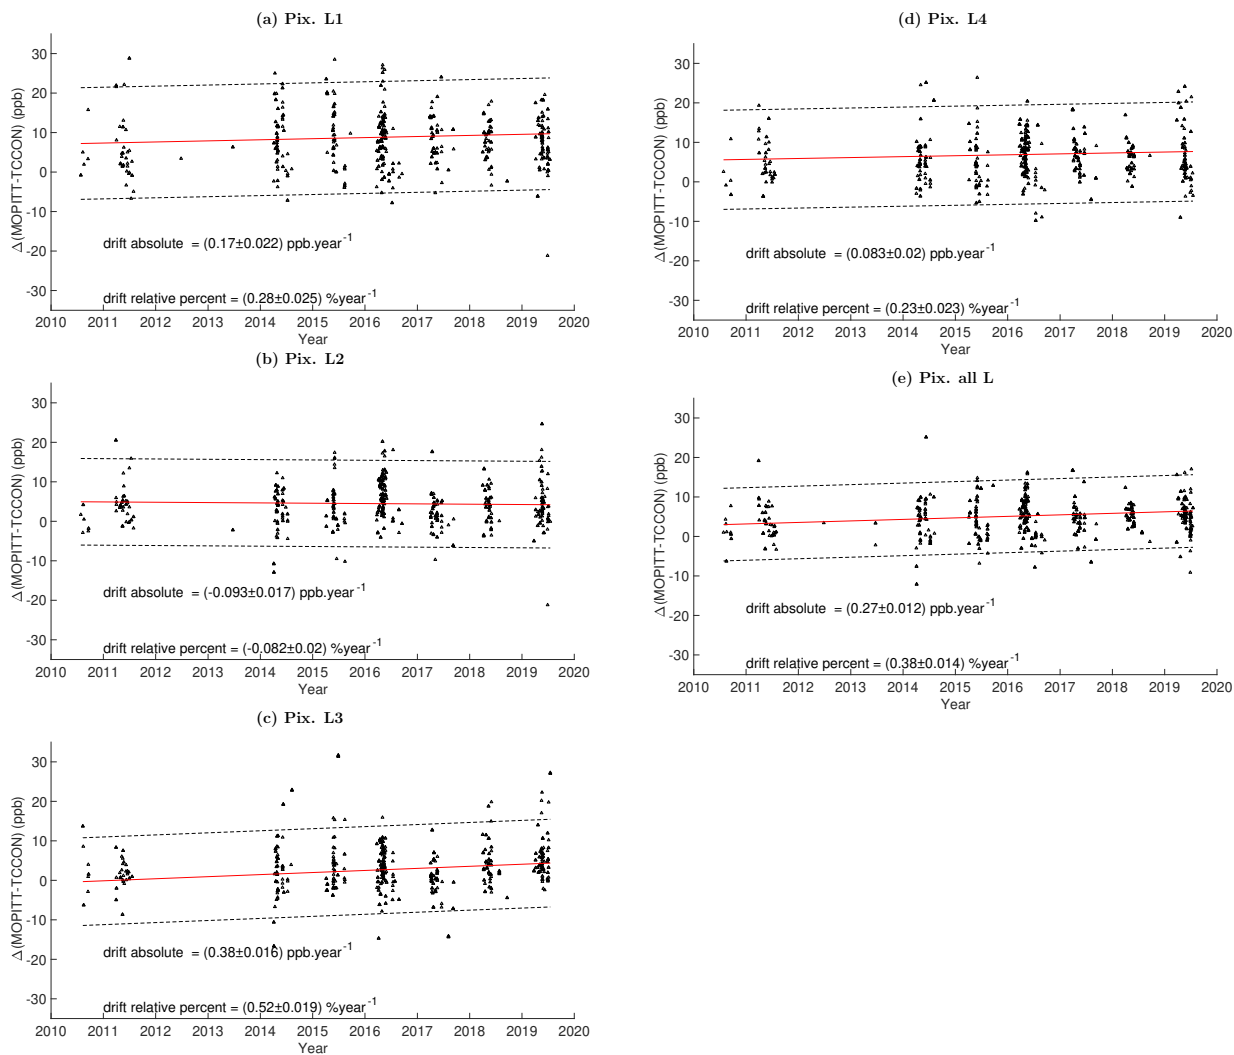

**Figure S12.** Temporal evolution of TCCON and TCCON bias corresponding Fig. S11.

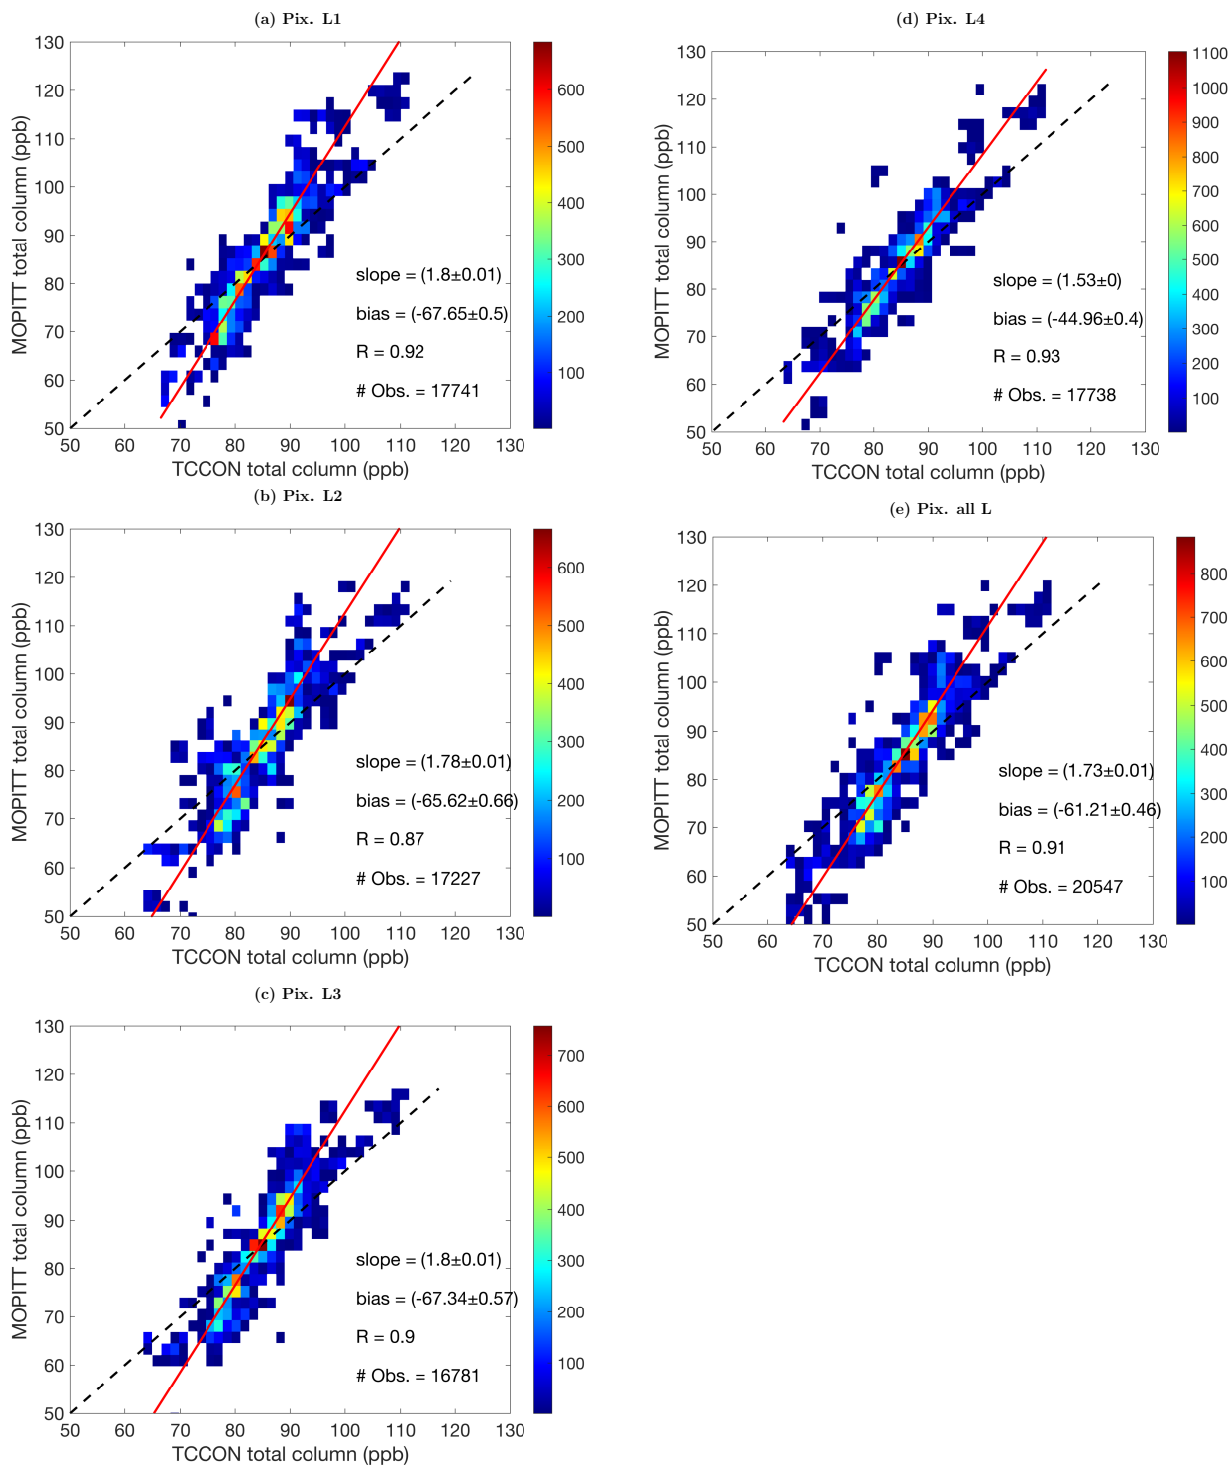

**Figure S13.** Correlation plots for the TCCON measurements vs. MOPITT TIR products for pixels over land measurements.

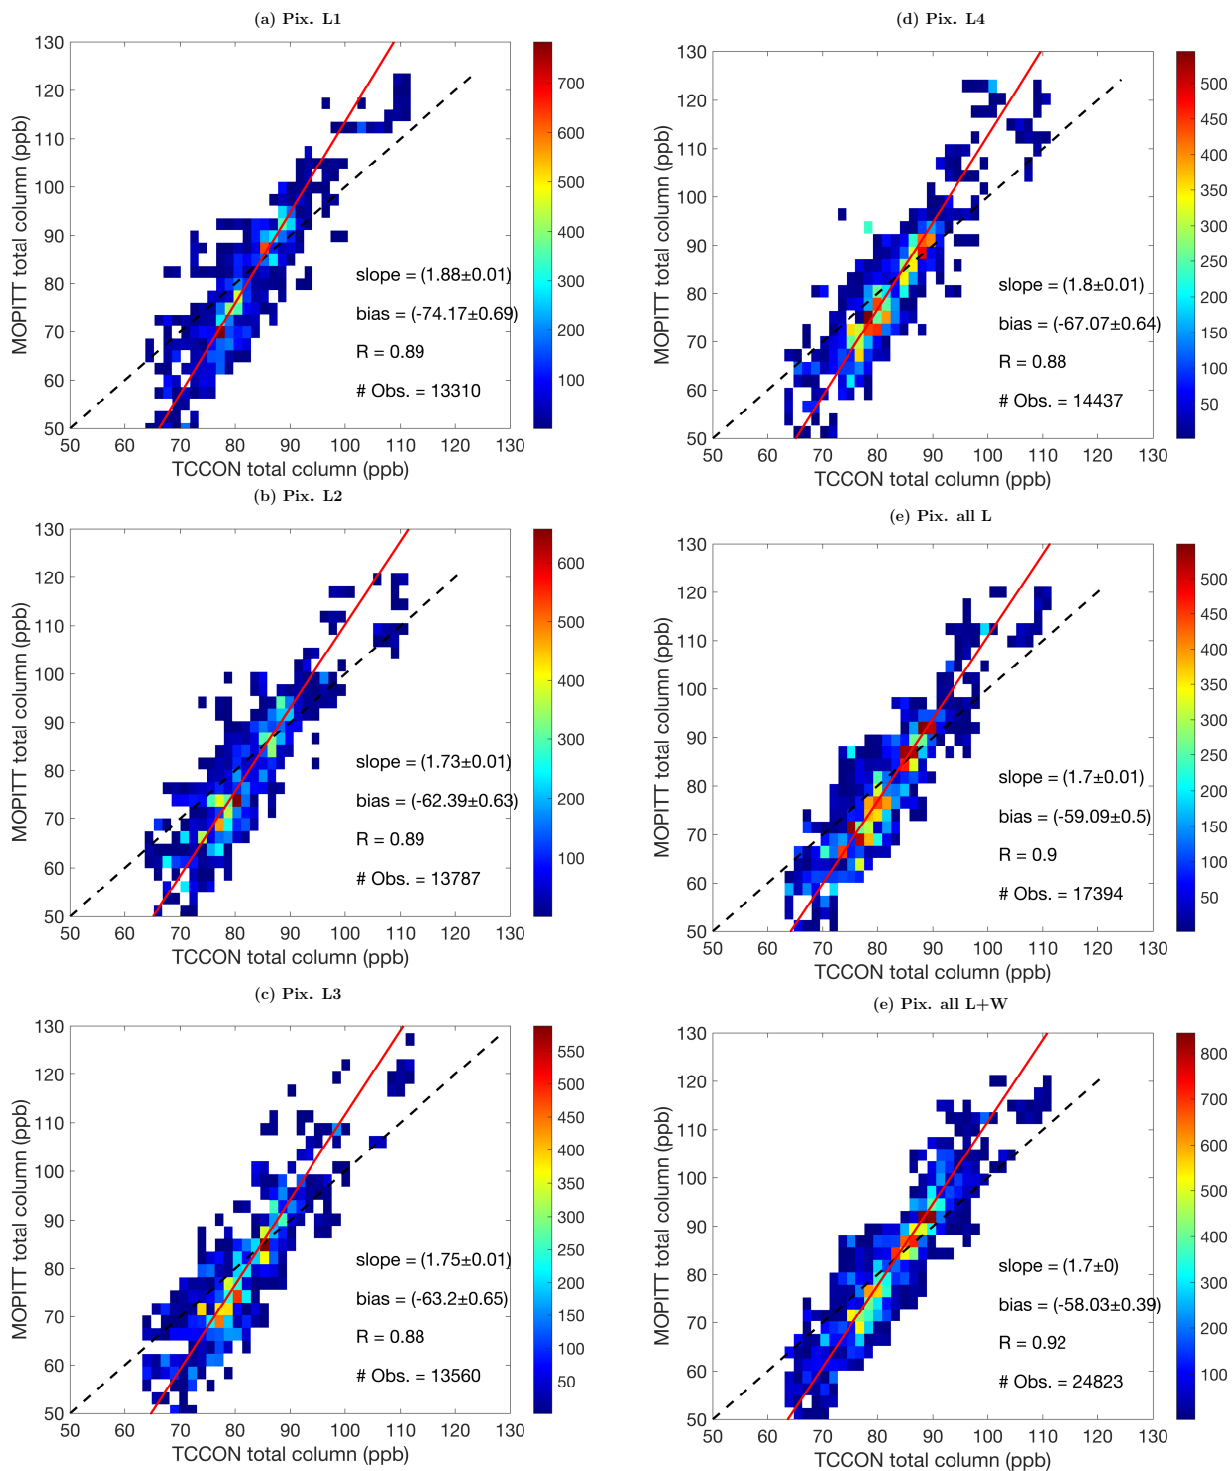

**Figure S14.** Correlation plots for the TCCON measurements vs. MOPITT TIR products for pixels over water measurements.

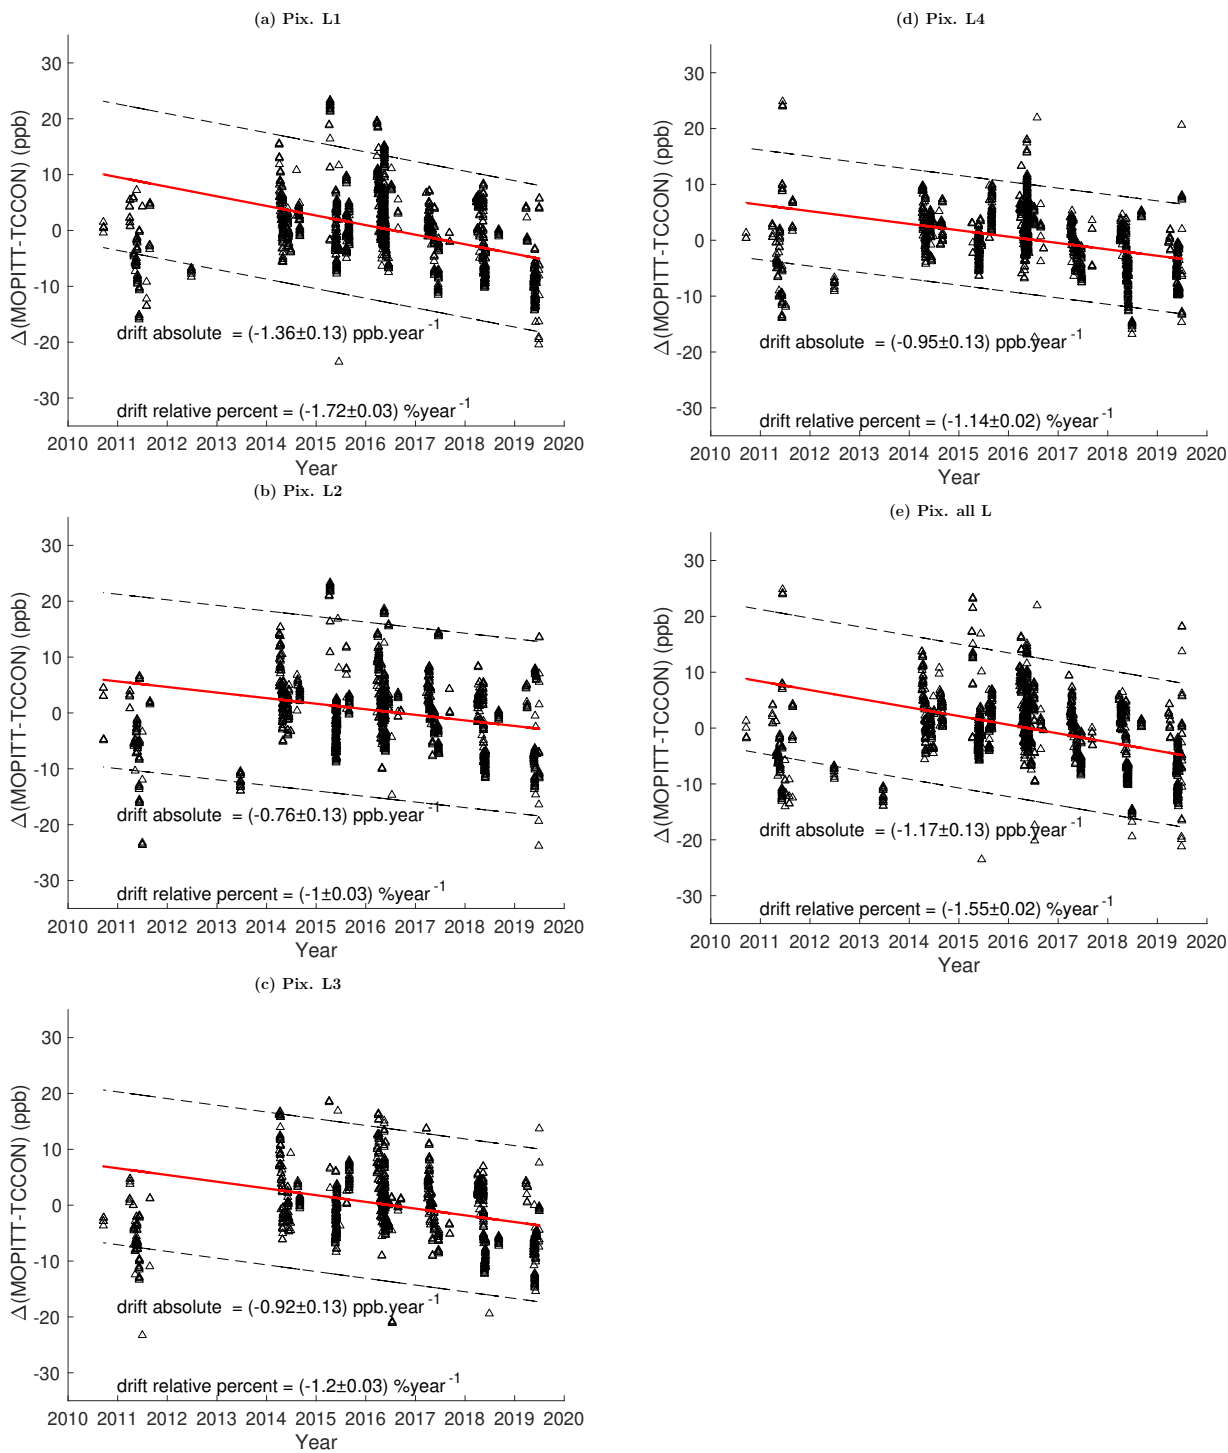

**Figure S15.** Temporal evolution of TCCON bias corresponding Fig. S13.

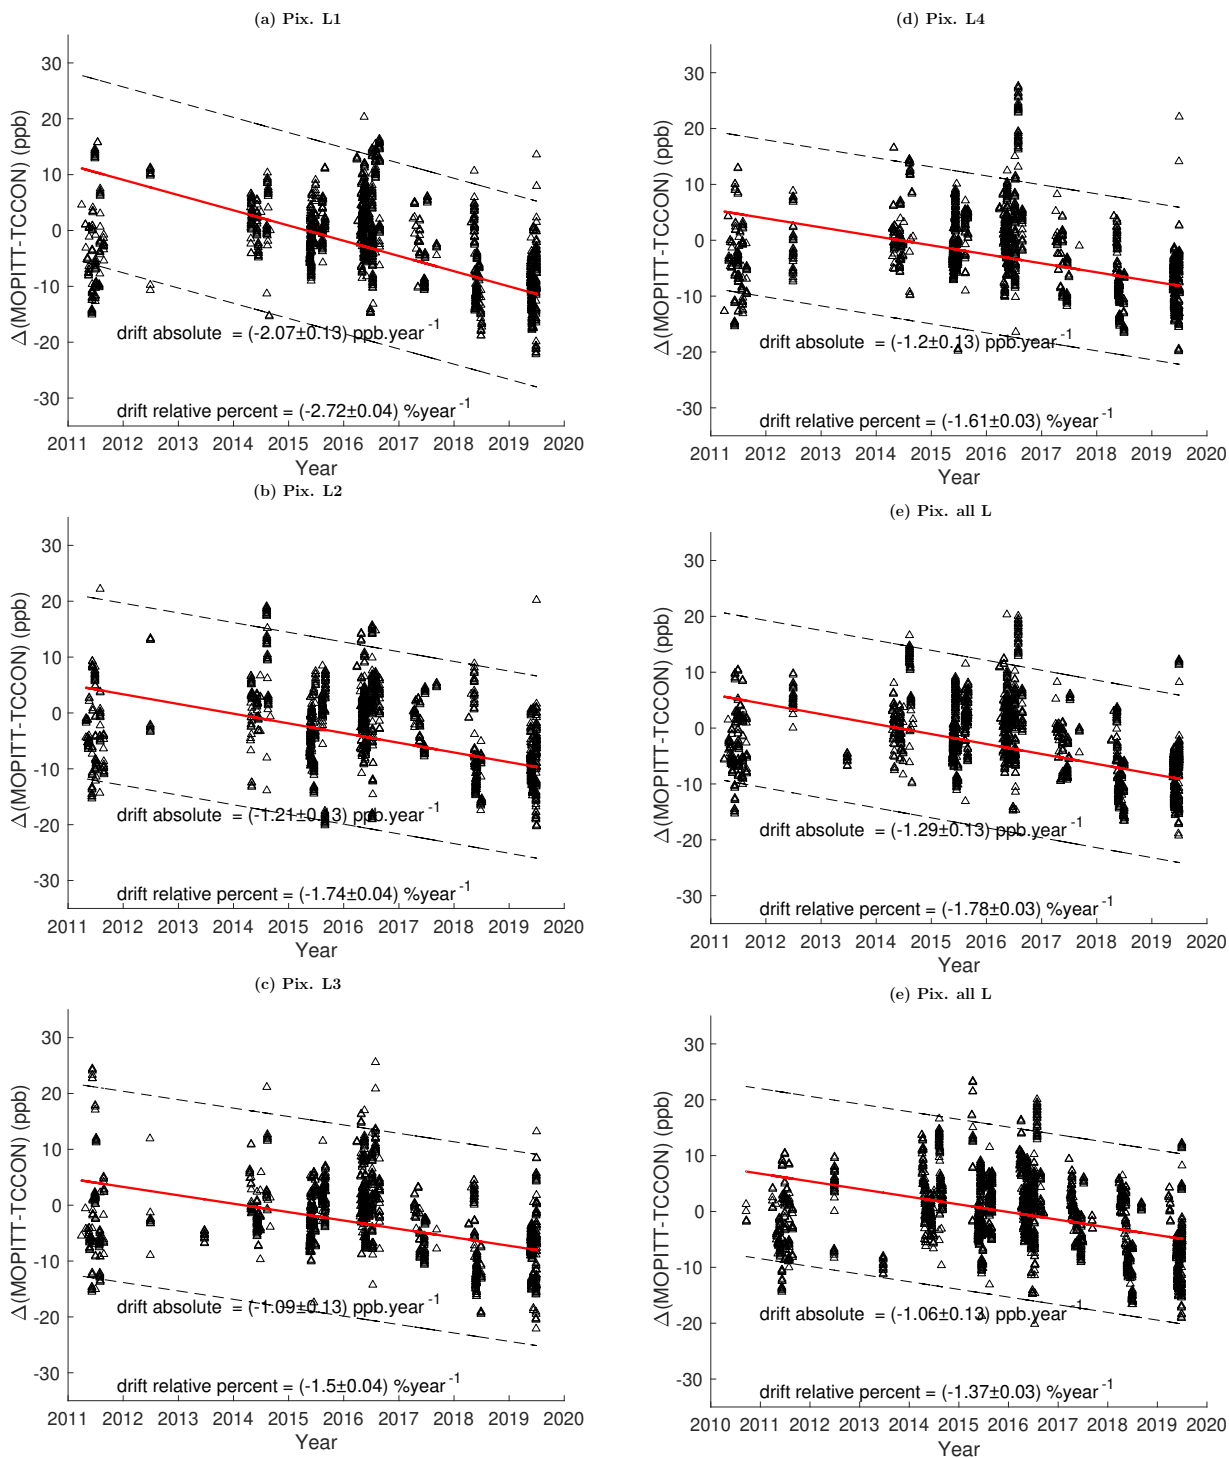

**Figure S16.** Temporal evolution of TCCON bias corresponding Fig. S14.

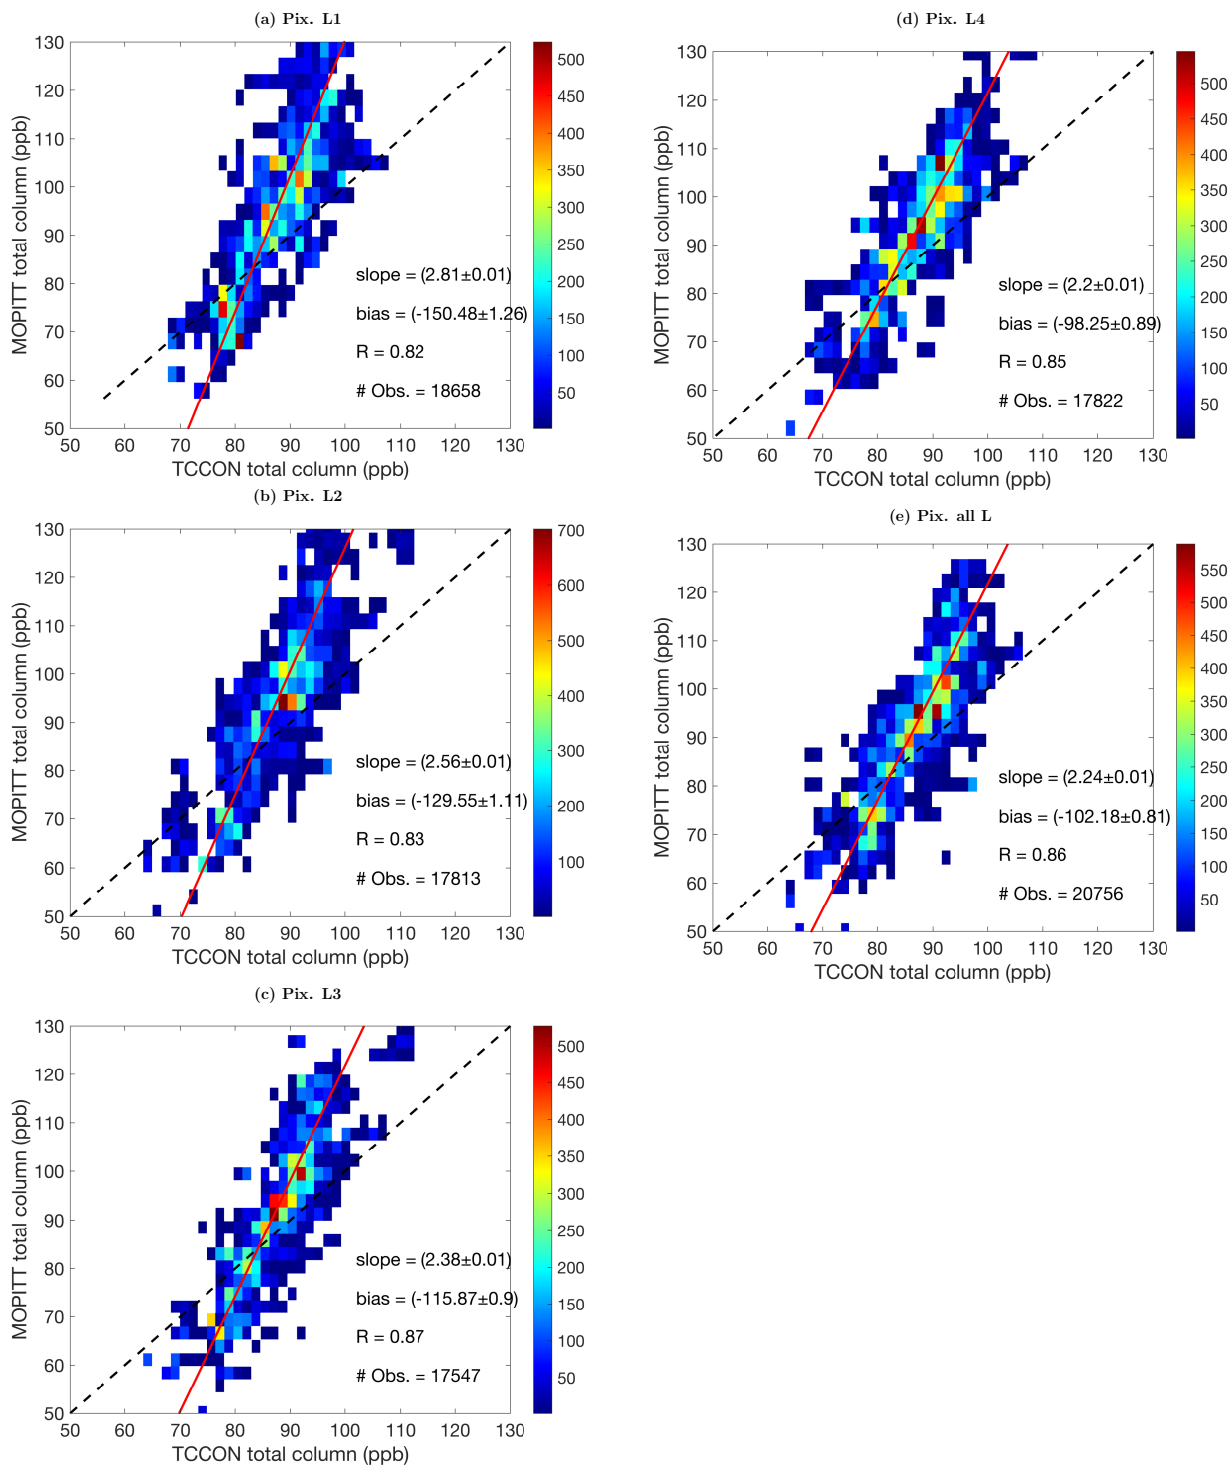

**Figure S17.** Correlation plots for the TCCON measurements vs. MOPITT joint products for pixels over land measurements.

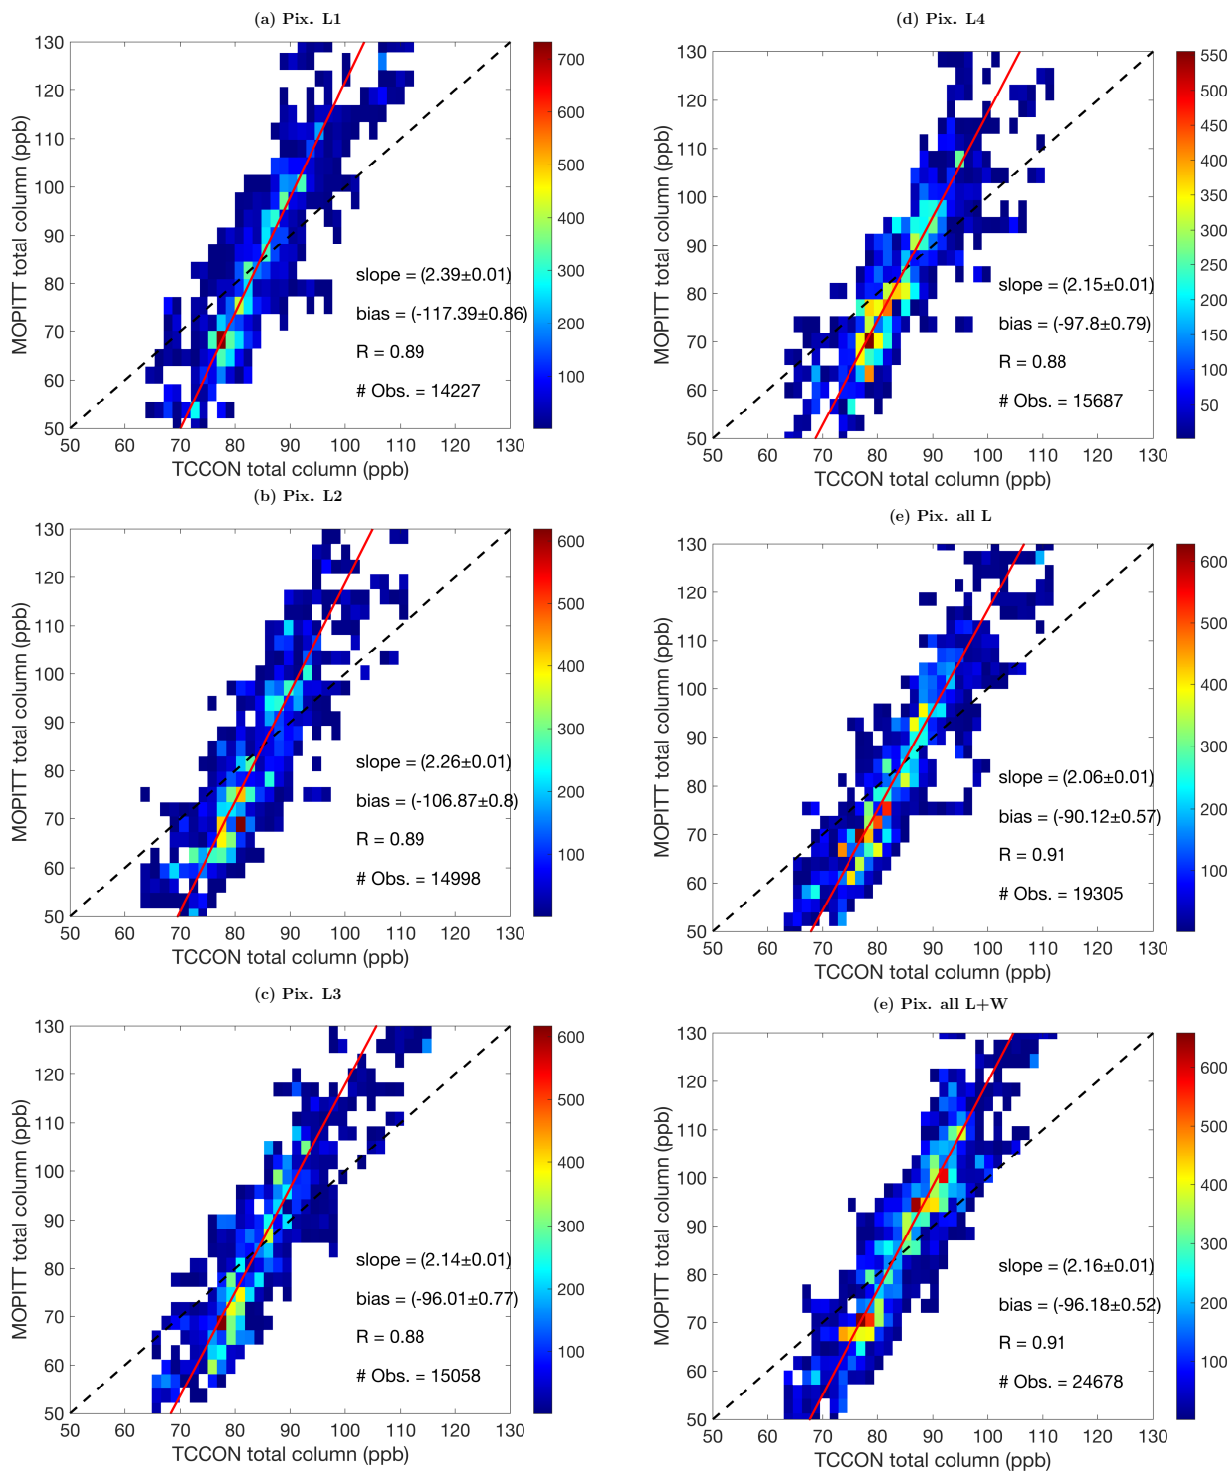

**Figure S18.** Correlation plots for the TCCON measurements vs. MOPITT joint products for pixels over water measurements.

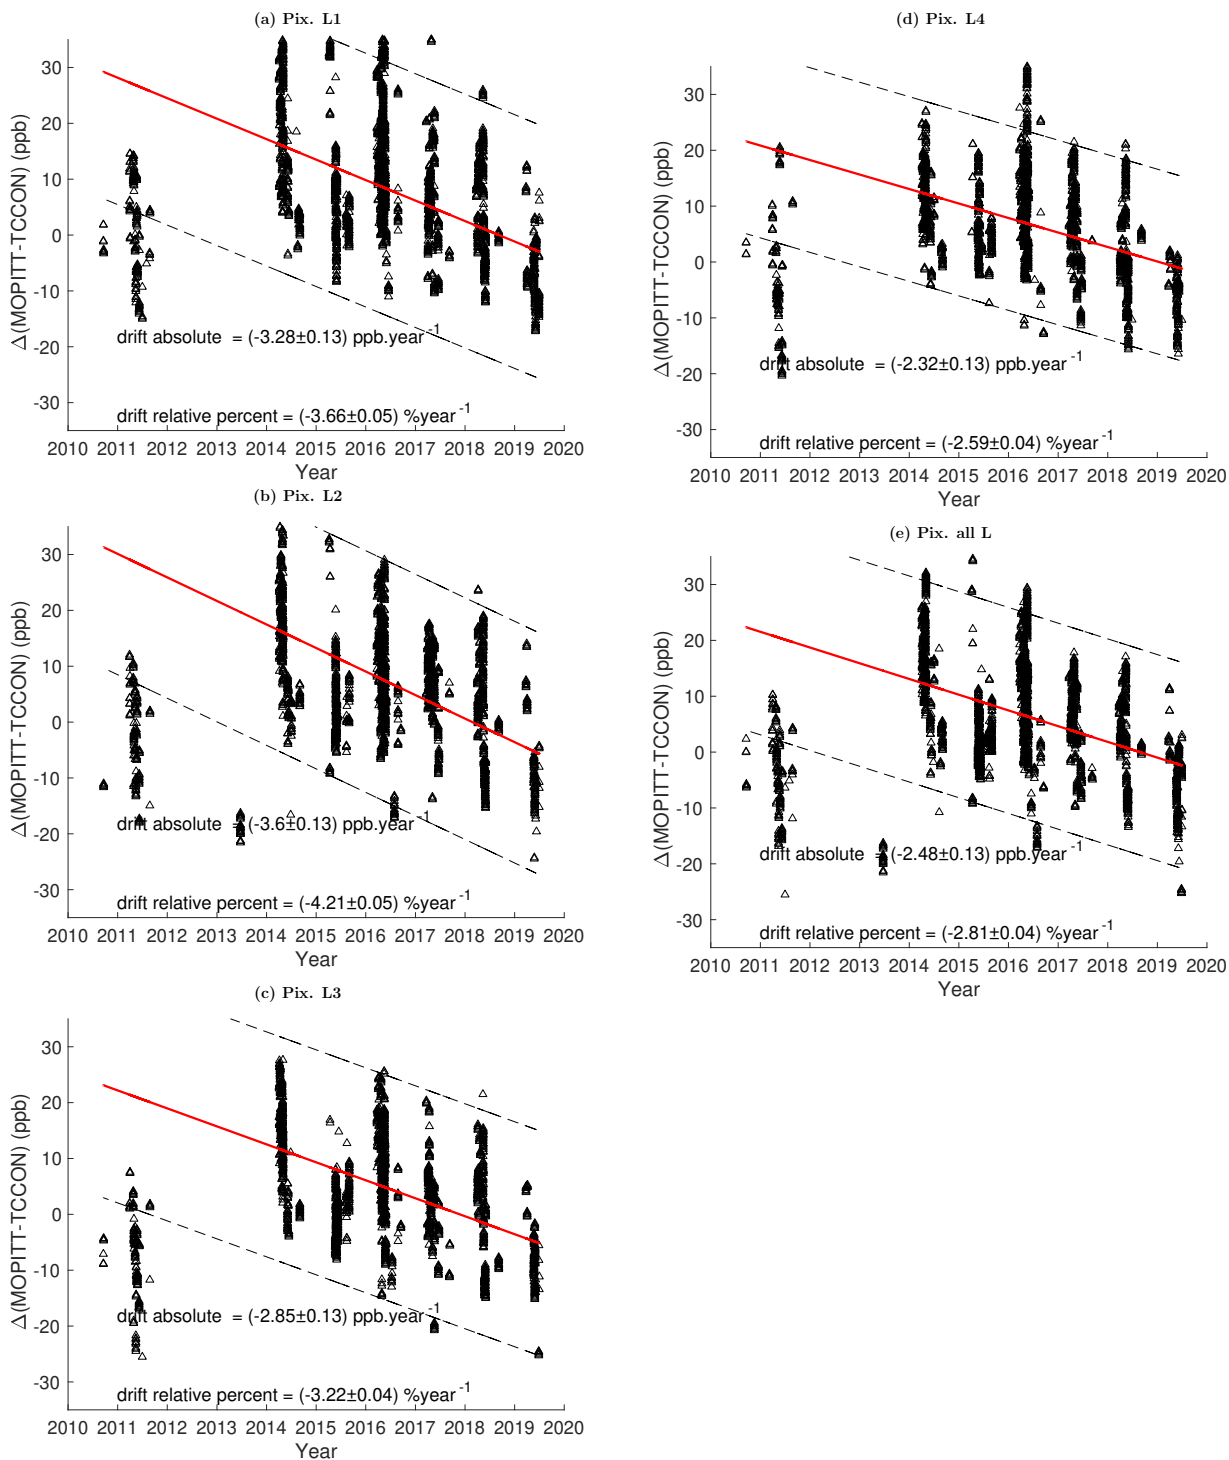

**Figure S19.** Temporal evolution of TCCON bias corresponding Fig. S17.



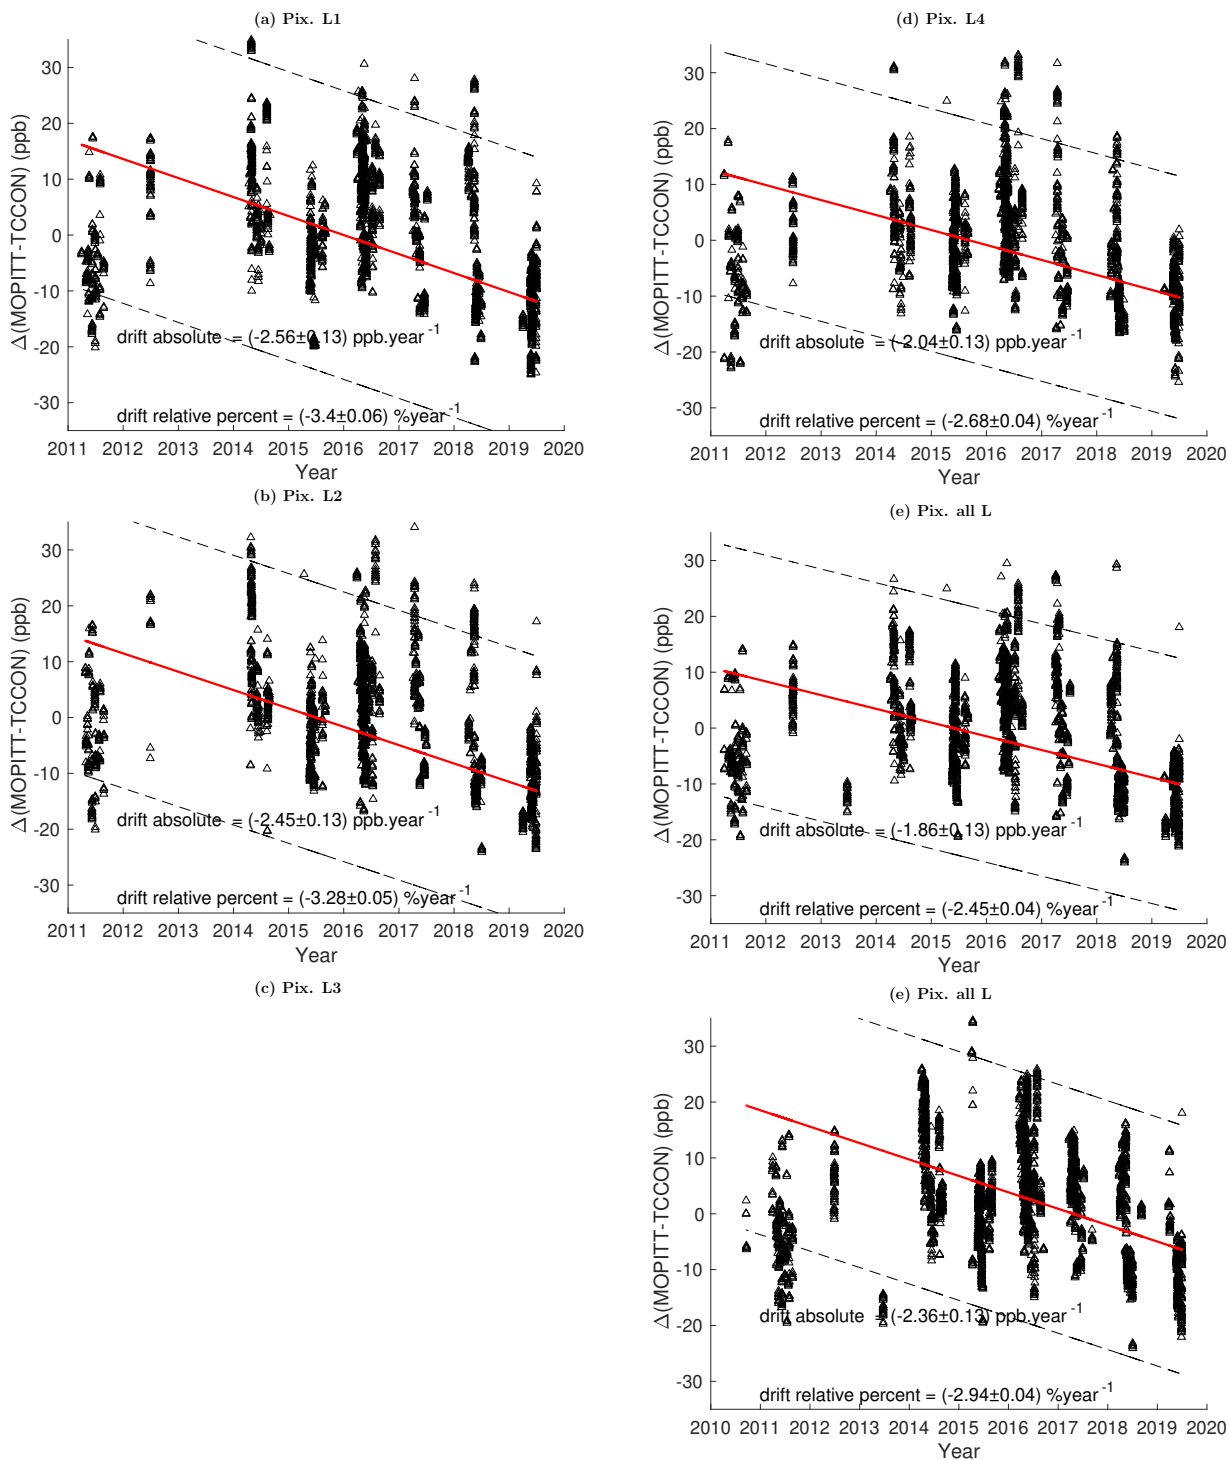

**Figure S20.** Temporal evolution of TCCON bias corresponding Fig. S18.
